# Supplementary figures and images for: Technical Note: Fast two-dimensional GC-MS with thermal extraction for anhydro-sugars in fine aerosols
Source: Copernicus journal article supplement (doi:10.5194/acp-10-4331-2010), 2010-05-07

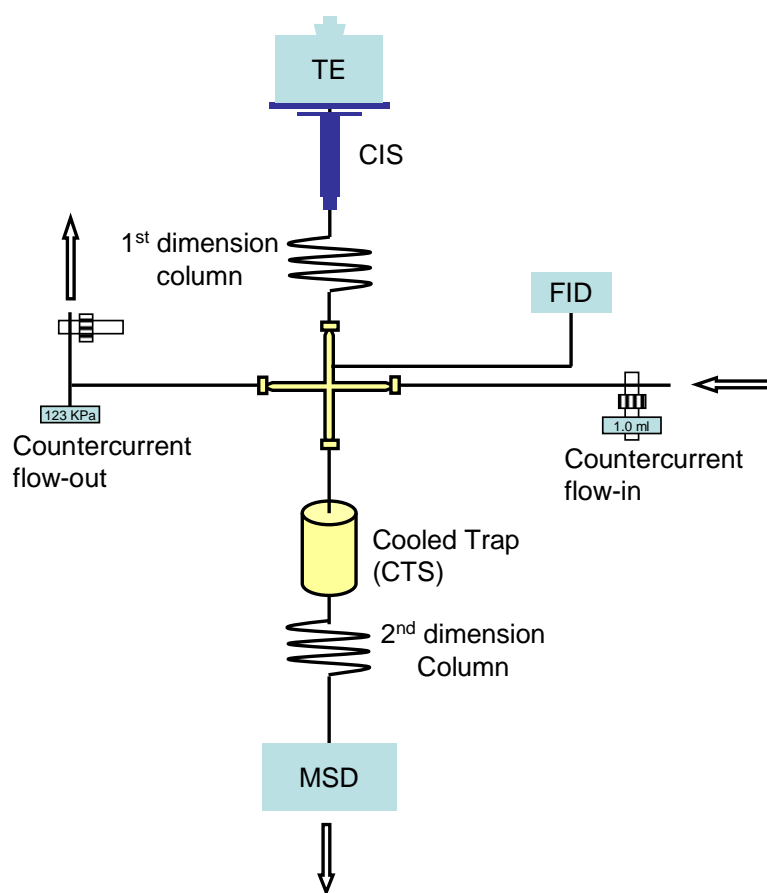

**Figure S1.** Schematic diagram of the 2-dimensional GC-MS system. Figure also appears in Ma and Hays, 2008.

Supplement: Supplementary file 1 [file acp-10-4331-2010-supplement.pdf]
